# Supplementary material for: Breast Tumour Kinase (Brk/PTK6) Contributes to Breast Tumour Xenograft Growth and Modulates Chemotherapeutic Responses In Vitro
Source: MDPI journal article supplement (doi:10.3390/genes13030402), 2022-02-24
Supplement: s1 [file s1]

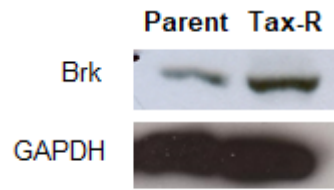

**Supplemental Figure S1: Brk is elevated in Taxol-resistant breast cancer cells.** Parental (Parent) and Taxol-resistant (Tax-R) T47D cells were lysed in 2x SDS-PAGE loading buffer and Brk levels assessed by western blotting.

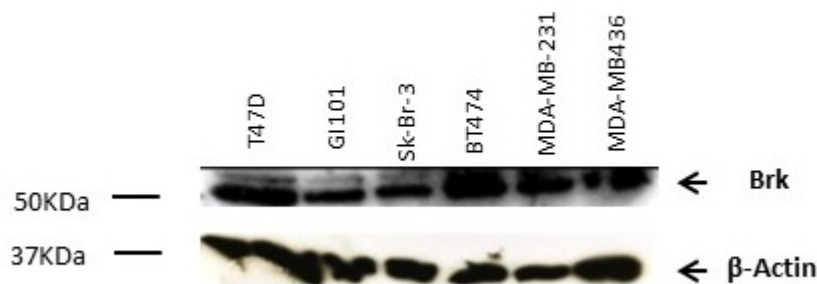

**Figure S2. Triple negative breast cancer (TNBC) cell lines express Brk.** Western blot comparing the levels of Brk protein in MDA-MB-231 and MDA-MB-436 cells relative to other breast cancer cell lines

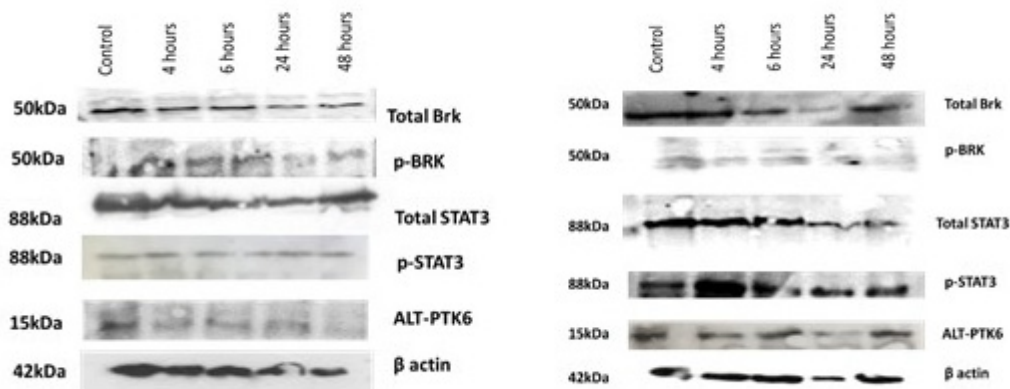

**Figure S3. Effect of 4f on phosphorylation.** MDA-MB-231 (left) and MDA-MB-436 (right) cells were treated with inhibitor 4f for the indicated time period and the effect on protein levels and phosphorylation determined by western blotting.

## Supplemental Tables

**Table S1: PTK6 overall survival**

### Overall Comparisons

|                                | Chi-Square | df | Sig. |
|--------------------------------|------------|----|------|
| Log Rank (Mantel-Cox)          | 8.600      | 1  | .003 |
| Breslow (Generalized Wilcoxon) | 6.339      | 1  | .012 |
| Tarone-Ware                    | 7.213      | 1  | .007 |

Test of equality of survival distributions for the different levels of VAR00019.

### Means and Medians for Survival Time

| VAR00019 | Mean <sup>a</sup> |            |                         |             | Median   |            |                         |             |
|----------|-------------------|------------|-------------------------|-------------|----------|------------|-------------------------|-------------|
|          | Estimate          | Std. Error | 95% Confidence Interval |             | Estimate | Std. Error | 95% Confidence Interval |             |
|          |                   |            | Lower Bound             | Upper Bound |          |            | Lower Bound             | Upper Bound |
| .00      | 139.600           | 5.515      | 128.791                 | 150.408     | .        | .          | .                       | .           |
| 1.00     | 97.292            | 12.077     | 73.621                  | 120.964     | 132.000  | 25.888     | 81.259                  | 182.741     |
| Overall  | 131.451           | 5.594      | 120.487                 | 142.415     | .        | .          | .                       | .           |

a. Estimation is limited to the largest survival time if it is censored.

**Table S2: PTK6 disease free survival**

### Overall Comparisons

|                                | Chi-Square | df | Sig. |
|--------------------------------|------------|----|------|
| Log Rank (Mantel-Cox)          | 4.517      | 1  | .034 |
| Breslow (Generalized Wilcoxon) | 4.488      | 1  | .034 |
| Tarone-Ware                    | 4.505      | 1  | .034 |

Test of equality of survival distributions for the different levels of VAR00019.

### Means and Medians for Survival Time

| VAR00019 | Mean <sup>a</sup> |            |                         |             | Median   |            |                         |             |
|----------|-------------------|------------|-------------------------|-------------|----------|------------|-------------------------|-------------|
|          | Estimate          | Std. Error | 95% Confidence Interval |             | Estimate | Std. Error | 95% Confidence Interval |             |
|          |                   |            | Lower Bound             | Upper Bound |          |            | Lower Bound             | Upper Bound |
| .00      | 132.496           | 6.200      | 120.343                 | 144.648     | .        | .          | .                       | .           |
| 1.00     | 92.813            | 11.417     | 70.436                  | 115.191     | 120.000  | .          | .                       | .           |
| Overall  | 125.752           | 5.965      | 114.061                 | 137.443     | .        | .          | .                       | .           |

a. Estimation is limited to the largest survival time if it is censored.

**Table S3: ALT-PTK6 overall survival**

| Overall Comparisons            |            |    |      |
|--------------------------------|------------|----|------|
|                                | Chi-Square | df | Sig. |
| Log Rank (Mantel-Cox)          | 1.153      | 1  | .283 |
| Breslow (Generalized Wilcoxon) | .639       | 1  | .424 |
| Tarone-Ware                    | .915       | 1  | .339 |

Test of equality of survival distributions for the different levels of VAR00035.

**Means and Medians for Survival Time**

| VAR00035 | Mean <sup>a</sup> |            |                         |             | Median   |            |                         |             |
|----------|-------------------|------------|-------------------------|-------------|----------|------------|-------------------------|-------------|
|          | Estimate          | Std. Error | 95% Confidence Interval |             | Estimate | Std. Error | 95% Confidence Interval |             |
|          |                   |            | Lower Bound             | Upper Bound |          |            | Lower Bound             | Upper Bound |
| .00      | 114.411           | 10.272     | 94.277                  | 134.545     | .        | .          | .                       | .           |
| 1.00     | 133.032           | 6.747      | 119.808                 | 146.256     | .        | .          | .                       | .           |
| Overall  | 130.029           | 5.876      | 118.512                 | 141.547     | .        | .          | .                       | .           |

a. Estimation is limited to the largest survival time if it is censored.

**Table S4: ALT-PTK6 disease free survival**

| Overall Comparisons            |            |    |      |
|--------------------------------|------------|----|------|
|                                | Chi-Square | df | Sig. |
| Log Rank (Mantel-Cox)          | .734       | 1  | .392 |
| Breslow (Generalized Wilcoxon) | .329       | 1  | .566 |
| Tarone-Ware                    | .514       | 1  | .474 |

Test of equality of survival distributions for the different levels of VAR00035.

**Means and Medians for Survival Time**

| VAR00035 | Mean <sup>a</sup> |            |                         |             | Median   |            |                         |             |
|----------|-------------------|------------|-------------------------|-------------|----------|------------|-------------------------|-------------|
|          | Estimate          | Std. Error | 95% Confidence Interval |             | Estimate | Std. Error | 95% Confidence Interval |             |
|          |                   |            | Lower Bound             | Upper Bound |          |            | Lower Bound             | Upper Bound |
| .00      | 109.935           | 10.599     | 89.161                  | 130.708     | .        | .          | .                       | .           |
| 1.00     | 126.414           | 7.312      | 112.082                 | 140.746     | .        | .          | .                       | .           |
| Overall  | 123.929           | 6.255      | 111.668                 | 136.190     | .        | .          | .                       | .           |

a. Estimation is limited to the largest survival time if it is censored.

**Table S5: ALT-PTK6:PTK6 ratio and overall survival**

**Overall Comparisons**

|                                | Chi-Square | df | Sig. |
|--------------------------------|------------|----|------|
| Log Rank (Mantel-Cox)          | 5.360      | 1  | .021 |
| Breslow (Generalized Wilcoxon) | 4.730      | 1  | .030 |
| Tarone-Ware                    | 5.071      | 1  | .024 |

Test of equality of survival distributions for the different levels of VAR00014.

**Means and Medians for Survival Time**

| VAR00014 | Mean <sup>a</sup> |            |                         |             | Median   |            |                         |             |
|----------|-------------------|------------|-------------------------|-------------|----------|------------|-------------------------|-------------|
|          | Estimate          | Std. Error | 95% Confidence Interval |             | Estimate | Std. Error | 95% Confidence Interval |             |
|          |                   |            | Lower Bound             | Upper Bound |          |            | Lower Bound             | Upper Bound |
| .00      | 121.357           | 7.657      | 106.349                 | 136.364     | .        | .          | .                       | .           |
| 1.00     | 139.333           | 4.535      | 130.444                 | 148.222     | .        | .          | .                       | .           |
| Overall  | 130.029           | 5.876      | 118.512                 | 141.547     | .        | .          | .                       | .           |

a. Estimation is limited to the largest survival time if it is censored.
